# Supplementary material for: Medicarpin and Homopterocarpin Isolated from Canavalia lineata as Potent and Competitive Reversible Inhibitors of Human Monoamine Oxidase-B
Source: MDPI journal article supplement (doi:10.3390/molecules28010258), 2022-12-28
Supplement: s1 [file s1]

SUPPORTING INFORMATION

# Medicarpin and Homopterocarpin Isolated from *Canavalia lineata* as Potent and Competitive Reversible Inhibitors of Human Monoamine Oxidase-B

Jong Min Oh <sup>1</sup>, Hyun-Jae Jang <sup>2</sup>, Myung-Gyun Kang <sup>3</sup>, Seul-Ki Mun <sup>1</sup>, Daeui Park <sup>3</sup>, Su-Jin Hong <sup>2</sup>, Min Ha Kim <sup>4</sup>, Soo-Young Kim <sup>4</sup>, Sung-Tae Yee <sup>1</sup>, Hoon Kim <sup>1,\*</sup>

<sup>1</sup> Department of Pharmacy, and Research Institute of Life Pharmaceutical Sciences, Suncheon National University, Suncheon 57922, Republic of Korea

<sup>2</sup> Natural Product Research Center, Korea Research Institute of Bioscience and Biotechnology, Cheongju, 28116, Republic of Korea

<sup>3</sup> Department of Predictive Toxicology, Korea Institute of Toxicology, Daejeon 34114, Republic of Korea

<sup>4</sup> National Institute of Biological Resources, Environmental Research Complex, Incheon 22689, Republic of Korea

\* Correspondence: hoon@snu.ac.kr (H.K.); Tel.: +82-61-750-3751

## Table of Contents

|                                                                                                                 |    |
|-----------------------------------------------------------------------------------------------------------------|----|
| <b>Figure S1.</b> Separation scheme of compounds (PN1–PN13) from <i>Canavalia lineata</i> pods. ....            | 2  |
| <b>Figure S2.</b> MS and UV chromatogram of <i>C. lineata</i> pod extract using UPLC-QTOF-MS. ....              | 3  |
| <b>Figure S3.</b> UPLC-QTOF-MS spectrum of rutin (1). ....                                                      | 4  |
| <b>Figure S4.</b> UPLC-QTOF-MS spectrum of (2R,3R)-3-hydroxy 7-O-β-D-glucopyranoside-6-methoxy-flavanone (2). . | 5  |
| <b>Figure S5.</b> UPLC-QTOF-MS spectrum of (–)-syringaresinol-4-O-β-D-glucopyranoside (3). ....                 | 6  |
| <b>Figure S6.</b> UPLC-QTOF-MS spectrum of ononin (4). ....                                                     | 7  |
| <b>Figure S7.</b> UPLC-QTOF-MS spectrum of syringaresinol (5). ....                                             | 8  |
| <b>Figure S8.</b> UPLC-QTOF-MS spectrum of (2R,3R)-3,7-dihydroxy-6-methoxyflavanone (6). ....                   | 9  |
| <b>Figure S9.</b> UPLC-QTOF-MS spectrum of cajanin (7). ....                                                    | 10 |
| <b>Figure S10.</b> UPLC-QTOF-MS spectrum of medicarpin (8). ....                                                | 11 |
| <b>Figure S11.</b> UPLC-QTOF-MS spectrum of prunetin (9). ....                                                  | 12 |
| <b>Figure S12.</b> UPLC-QTOF-MS spectrum of 7,4'-dimethyl-3'-hydroxygenistein (10). ....                        | 13 |
| <b>Figure S13.</b> UPLC-QTOF-MS spectrum of 7,4'-dimethoxyisoflavone (11). ....                                 | 14 |
| <b>Figure S14.</b> UPLC-QTOF-MS spectrum of pterocarpin (12). ....                                              | 15 |
| <b>Figure S15.</b> UPLC-QTOF-MS spectrum of homopterocarpin (13). ....                                          | 16 |
| <b>Figure S16.</b> IC <sub>50</sub> curve of medicarpin (8) for hMAO-B. ....                                    | 17 |
| <b>Figure S17.</b> IC <sub>50</sub> curves of homopterocarpin (13) for hMAO-A (A) and hMAO-B (B). ....          | 18 |

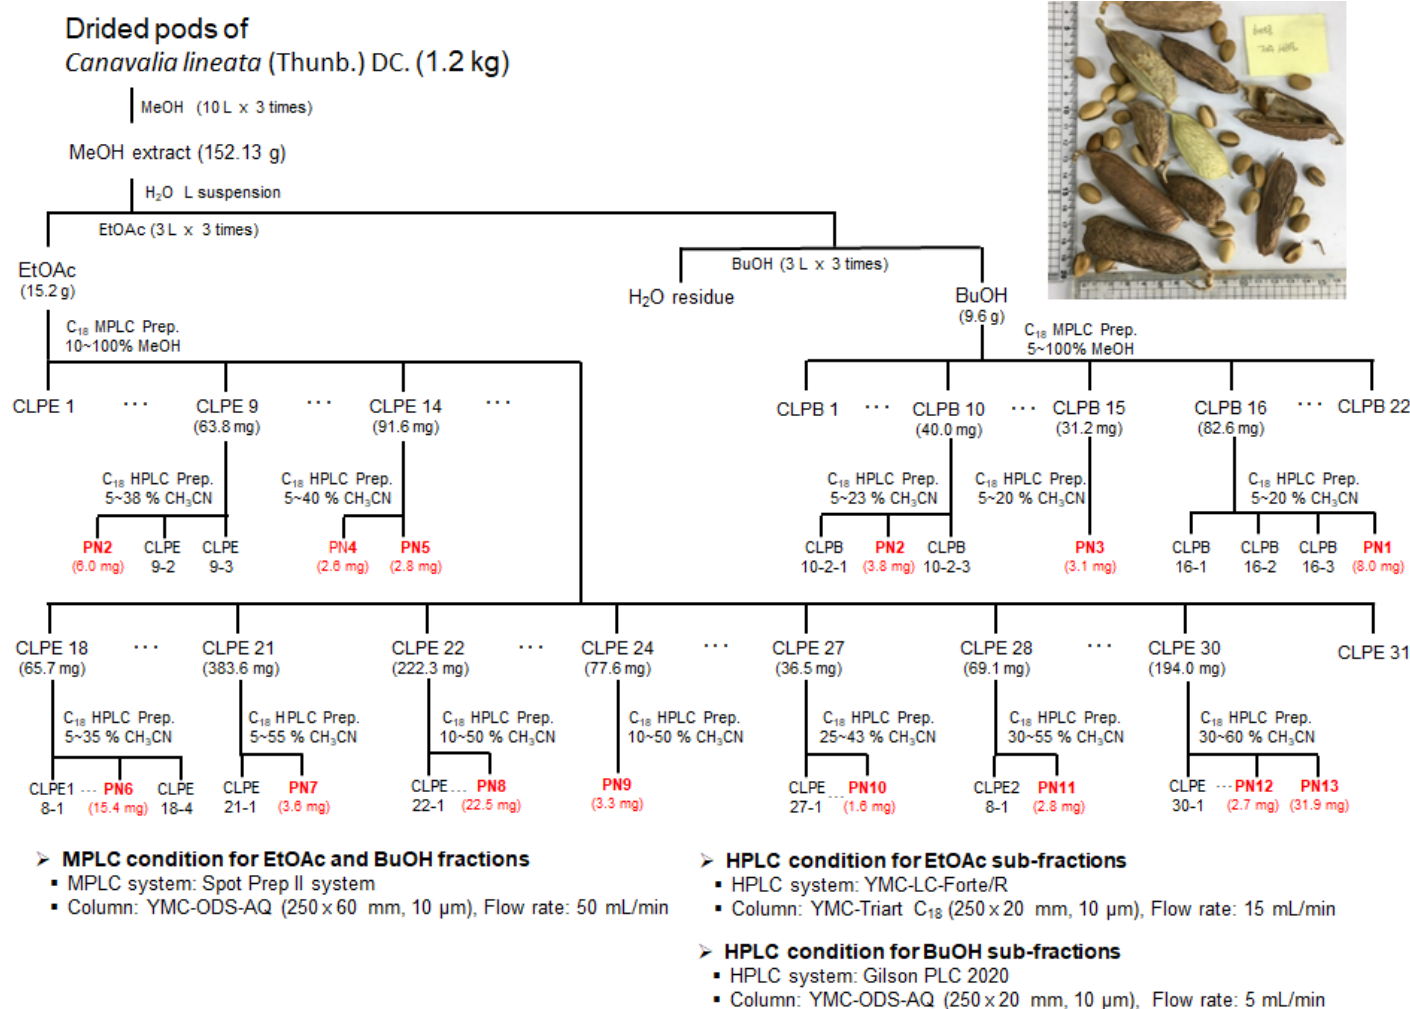

**Figure S1.** Separation scheme of compounds (PN1–PN13) from *Canavalia lineata* pods.

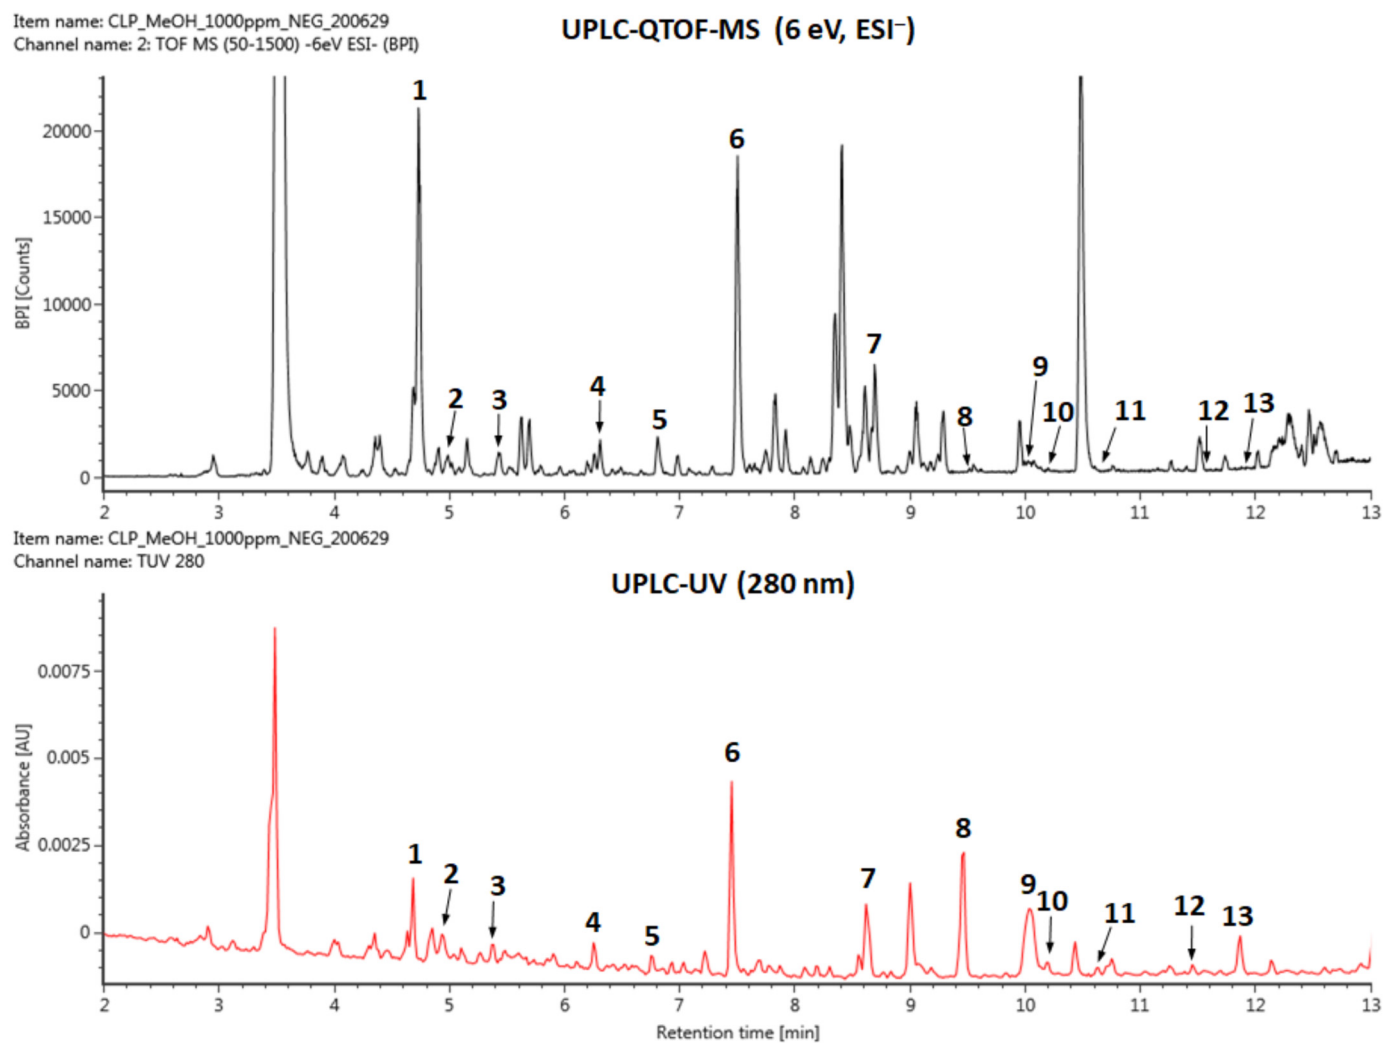

**Figure S2.** MS and UV chromatogram of *C. lineata* pod extract using UPLC-QTOF-MS.

## PN 1. Rutin

| Mass     | Calc. Mass | mDa  | PPM  | DBE  | Formula     | C  | H  | O  |
|----------|------------|------|------|------|-------------|----|----|----|
| 611.1608 | 611.1612   | -0.4 | -0.7 | 12.5 | C27 H31 O16 | 27 | 31 | 16 |
|          | 611.1647   | -3.9 | -6.4 | 34.5 | C45 H23 O3  | 45 | 23 | 3  |
|          | 611.1553   | 5.5  | 9.0  | 21.5 | C34 H27 O11 | 34 | 27 | 11 |

CLPB\_16\_4\_100ppm\_POS\_200628 1373 (4.721) Cm (1369:1379)

1: TOF MS ES+  
3.02e6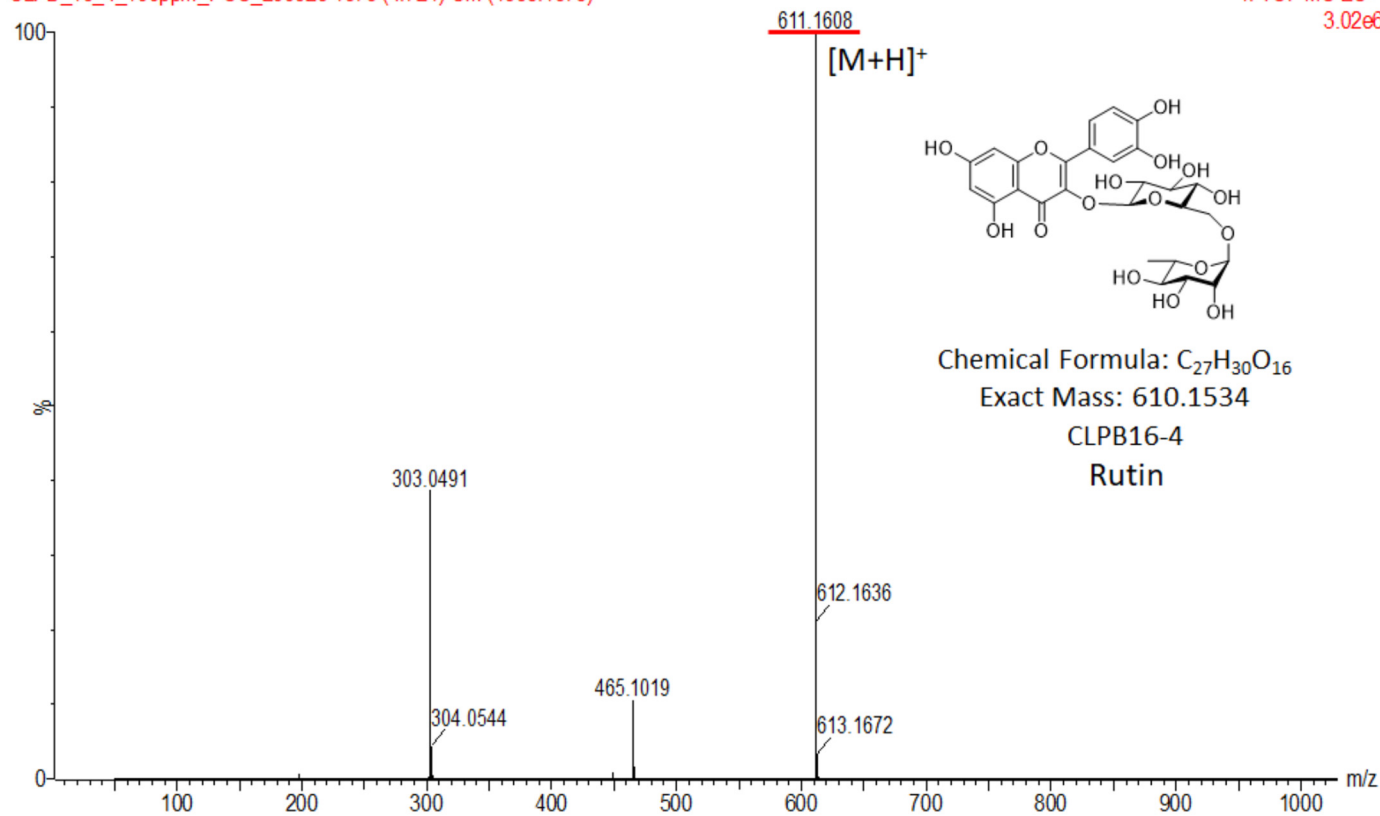

Figure S3. UPLC-QTOF-MS spectrum of rutin (1).

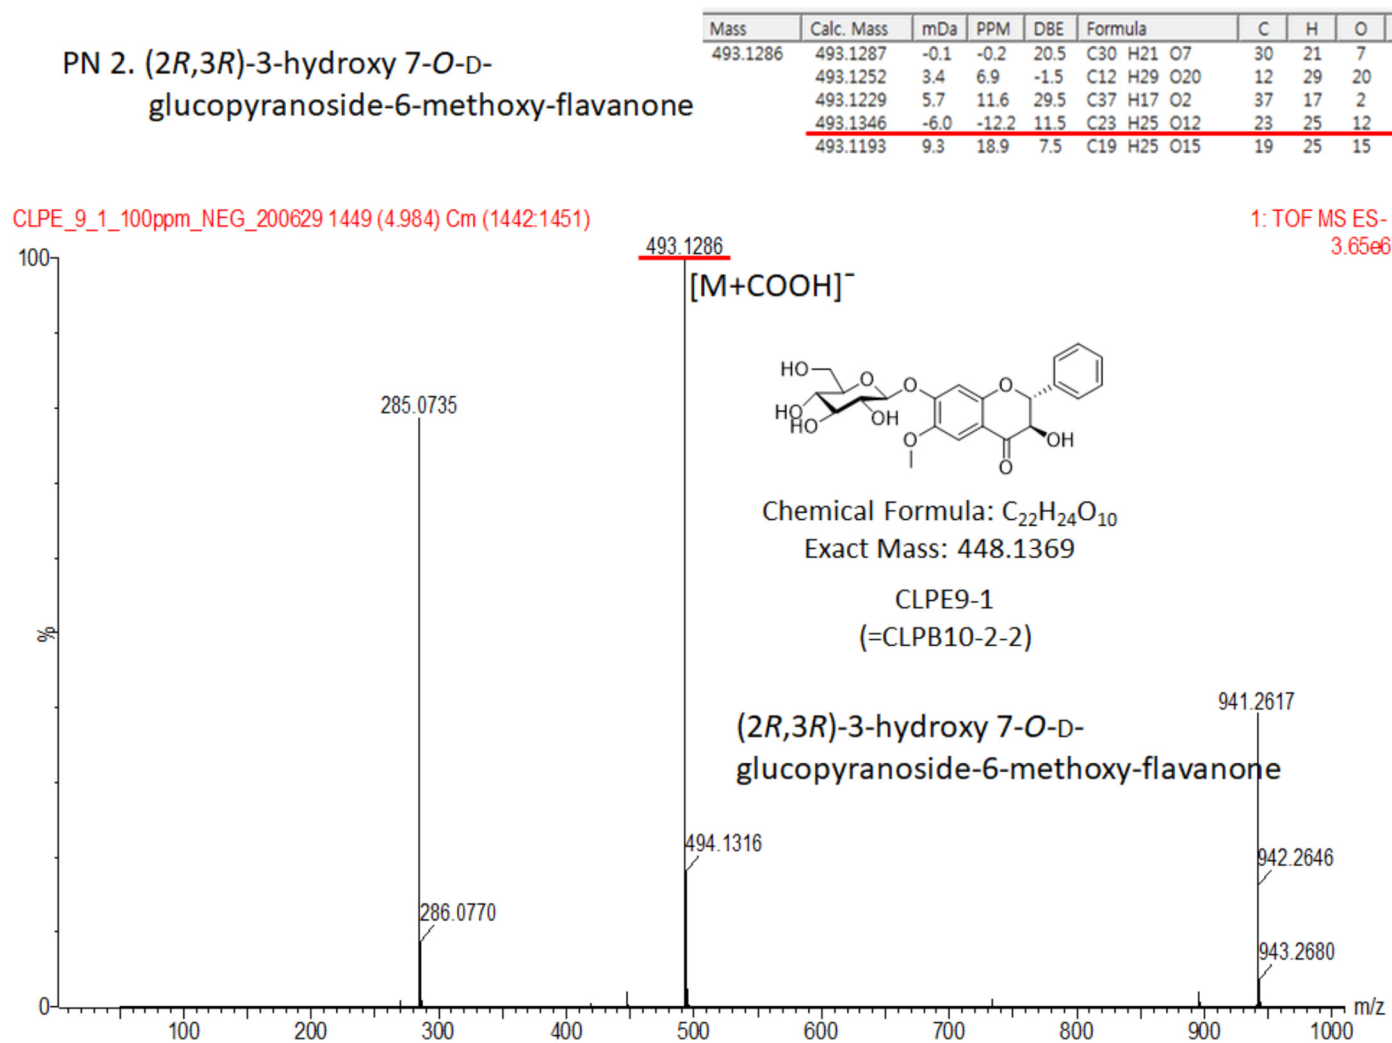

**Figure S4.** UPLC-QTOF-MS spectrum of (2*R*,3*R*)-3-hydroxy 7-*O*-β-D-glucopyranoside-6-methoxy-flavanone (2).

PN 3. Syringaresinol-4-*O*- $\beta$ -D-glucopyranoside

| Mass     | Calc. Mass | mDa  | PPM  | DBE  | Formula                                         | C  | H  | O  |
|----------|------------|------|------|------|-------------------------------------------------|----|----|----|
| 579.2056 | 579.2078   | -2.2 | -3.8 | 11.5 | C <sub>28</sub> H <sub>35</sub> O <sub>13</sub> | 28 | 35 | 13 |

CLPB\_15\_2\_3\_100ppm\_NEG\_200629 1571 (5.409) Cm (1568:1579)

1: TOF MS ES-  
4.85e6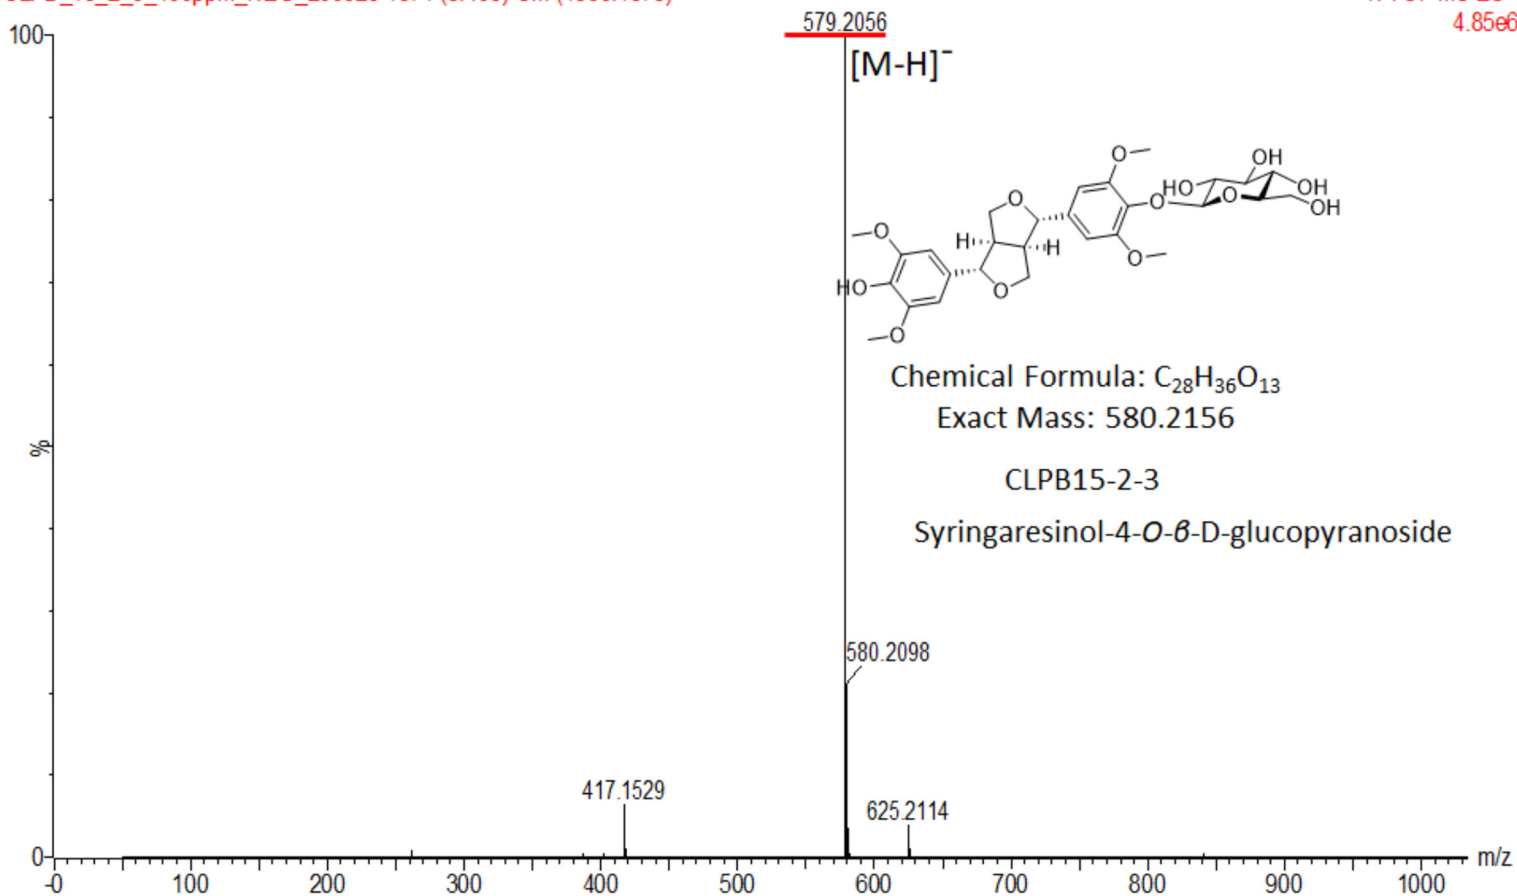Figure S5. UPLC-QTOF-MS spectrum of (-)-syringaresinol-4-*O*- $\beta$ -D-glucopyranoside (3).

## PN 4. Ononin

| Mass     | Calc. Mass | mDa   | PPM  | DBE  | Formula     | C  | H  | O  |
|----------|------------|-------|------|------|-------------|----|----|----|
| 431.1305 | 431.1283   | 2.2   | 5.1  | 20.5 | C29 H19 O4  | 29 | 19 | 4  |
| 431.1342 | -3.7       | -8.6  | 11.5 |      | C22 H23 O9  | 22 | 23 | 9  |
| 431.1248 | 5.7        | 13.2  | -1.5 |      | C11 H27 O17 | 11 | 27 | 17 |
| 431.1401 | -9.6       | -22.3 | 2.5  |      | C15 H27 O14 | 15 | 27 | 14 |
| 431.1190 | 11.5       | 26.7  | 7.5  |      | C18 H23 O12 | 18 | 23 | 12 |

CLPE\_14\_1\_100ppm\_POS\_200628 1833 (6.310) Cm (1827:1839)

1: TOF MS ES+  
1.04e7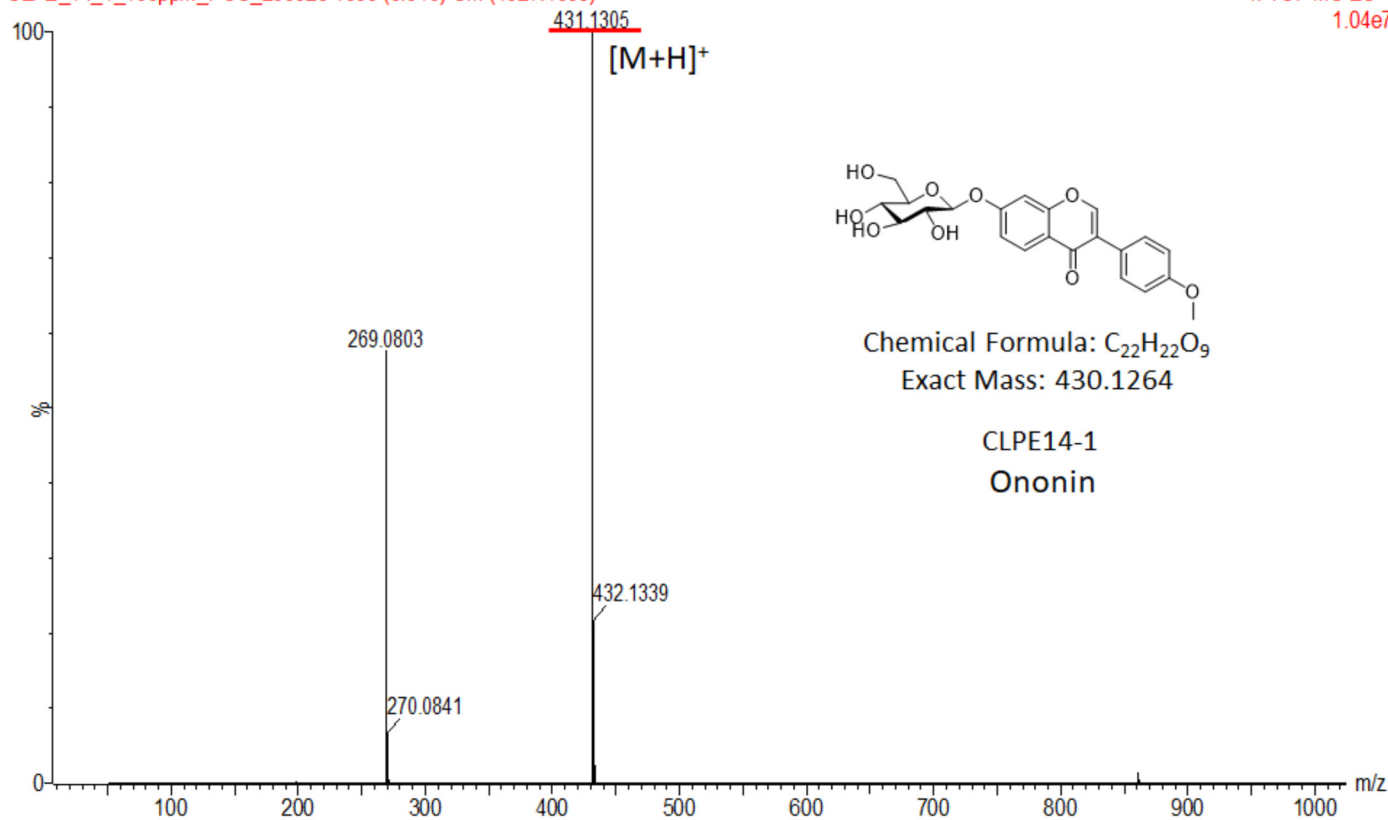

Figure S6. UPLC-QTOF-MS spectrum of ononin (4).

## PN 5. Syringaresinol

| Mass     | Calc. Mass | mDa  | PPM   | DBE  | Formula     | C  | H  | O  |
|----------|------------|------|-------|------|-------------|----|----|----|
| 419.1668 | 419.1647   | 2.1  | 5.0   | 18.5 | C29 H23 O3  | 29 | 23 | 3  |
|          | 419.1706   | -3.8 | -9.1  | 9.5  | C22 H27 O8  | 22 | 27 | 8  |
|          | 419.1765   | -9.7 | -23.1 | 0.5  | C15 H31 O13 | 15 | 31 | 13 |
|          | 419.1553   | 11.5 | 27.4  | 5.5  | C18 H27 O11 | 18 | 27 | 11 |

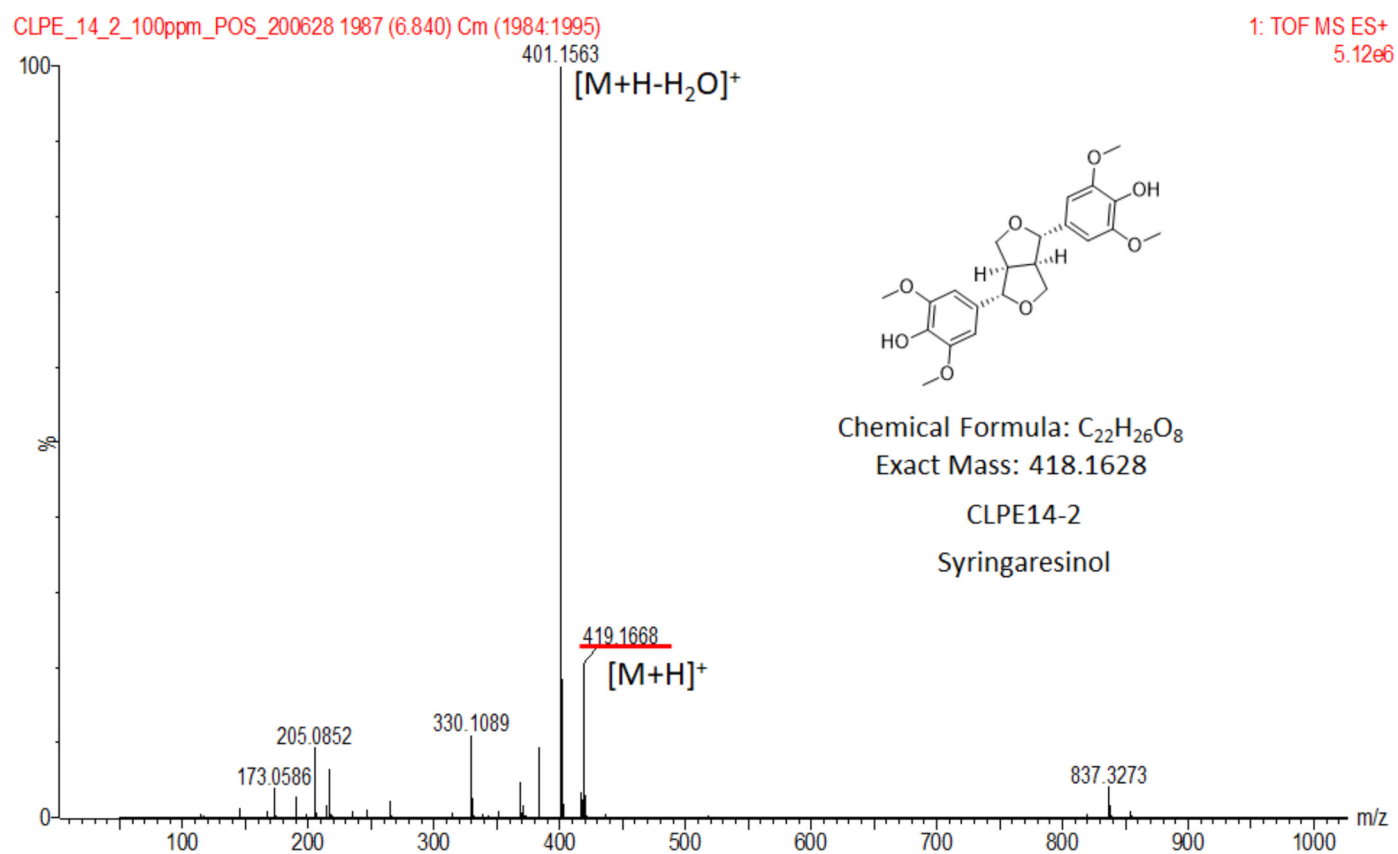

Figure S7. UPLC-QTOF-MS spectrum of syringaresinol (5).



PN 6. (2*R*,3*R*)-3,7'-Dihydroxy-6-methoxy-flavanone

| Mass     | Calc. Mass | mDa  | PPM   | DBE  | Formula    | C  | H  | O  |
|----------|------------|------|-------|------|------------|----|----|----|
| 287.0902 | 287.0919   | -1.7 | -5.9  | 9.5  | C16 H15 O5 | 16 | 15 | 5  |
|          | 287.0861   | 4.1  | 14.3  | 18.5 | C23 H11    | 23 | 11 |    |
|          | 287.0978   | -7.6 | -26.5 | 0.5  | C9 H19 O10 | 9  | 19 | 10 |

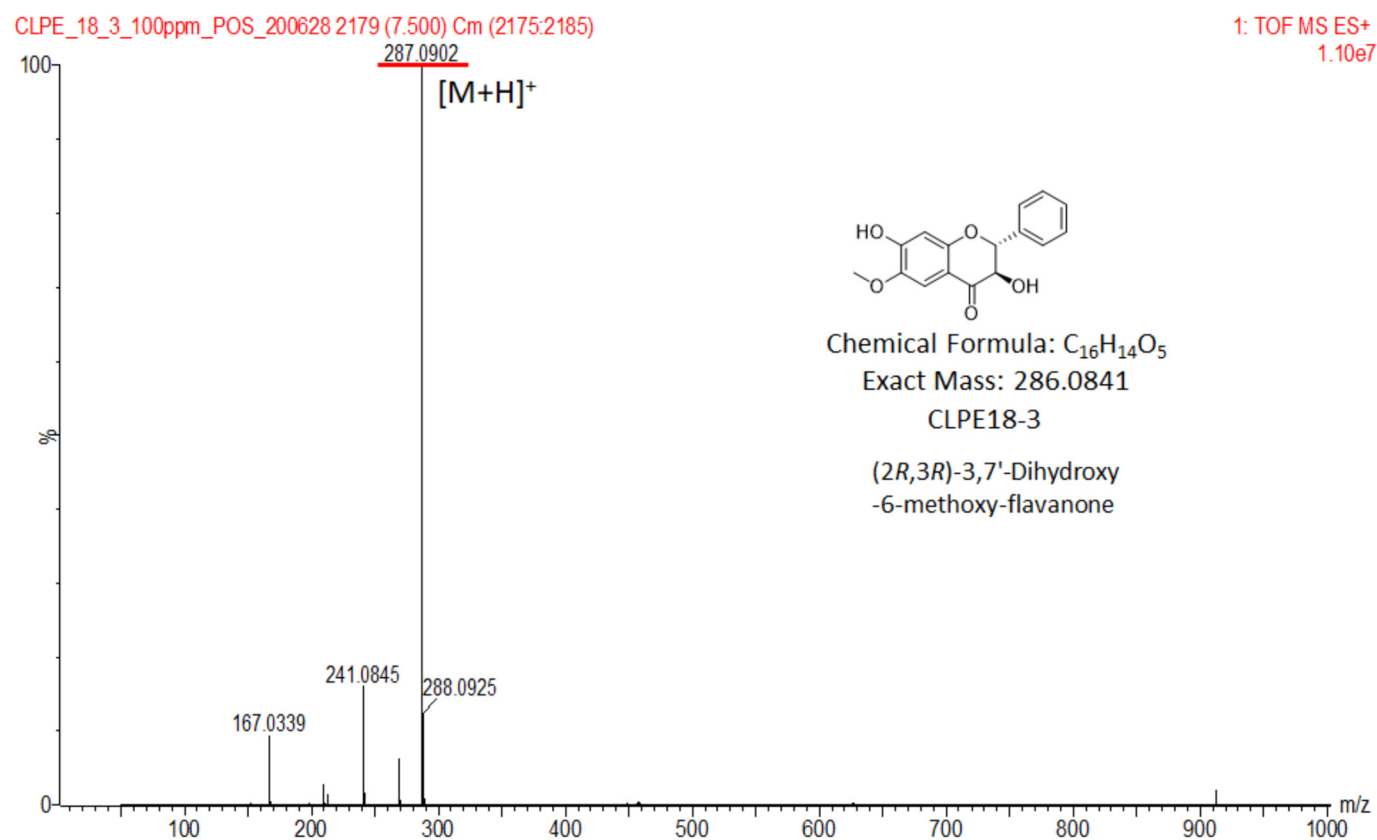

Figure S8. UPLC-QTOF-MS spectrum of (2*R*,3*R*)-3,7-dihydroxy-6-methoxyflavanone (6).

## PN 7. Cajanin

| Mass     | Calc. Mass | mDa   | PPM   | DBE  | Formula    | C  | H  | O  |
|----------|------------|-------|-------|------|------------|----|----|----|
| 301.0555 | 301.0560   | -0.5  | -1.7  | 6.5  | C12 H13 O9 | 12 | 13 | 9  |
|          |            | 5.4   | 17.9  | 15.5 | C19 H9 O4  | 19 | 9  | 4  |
|          |            | -9.8  | -32.6 | 19.5 | C23 H9 O   | 23 | 9  | 1  |
|          |            | 14.8  | 49.2  | 2.5  | C8 H13 O12 | 8  | 13 | 12 |
|          |            | -15.7 | -52.1 | 10.5 | C16 H13 O6 | 16 | 13 | 6  |

CLPE\_21\_M3\_100ppm\_POS\_200727 2530 (8.708) Cm (2521:2535)

1: TOF MS ES+  
5.15e7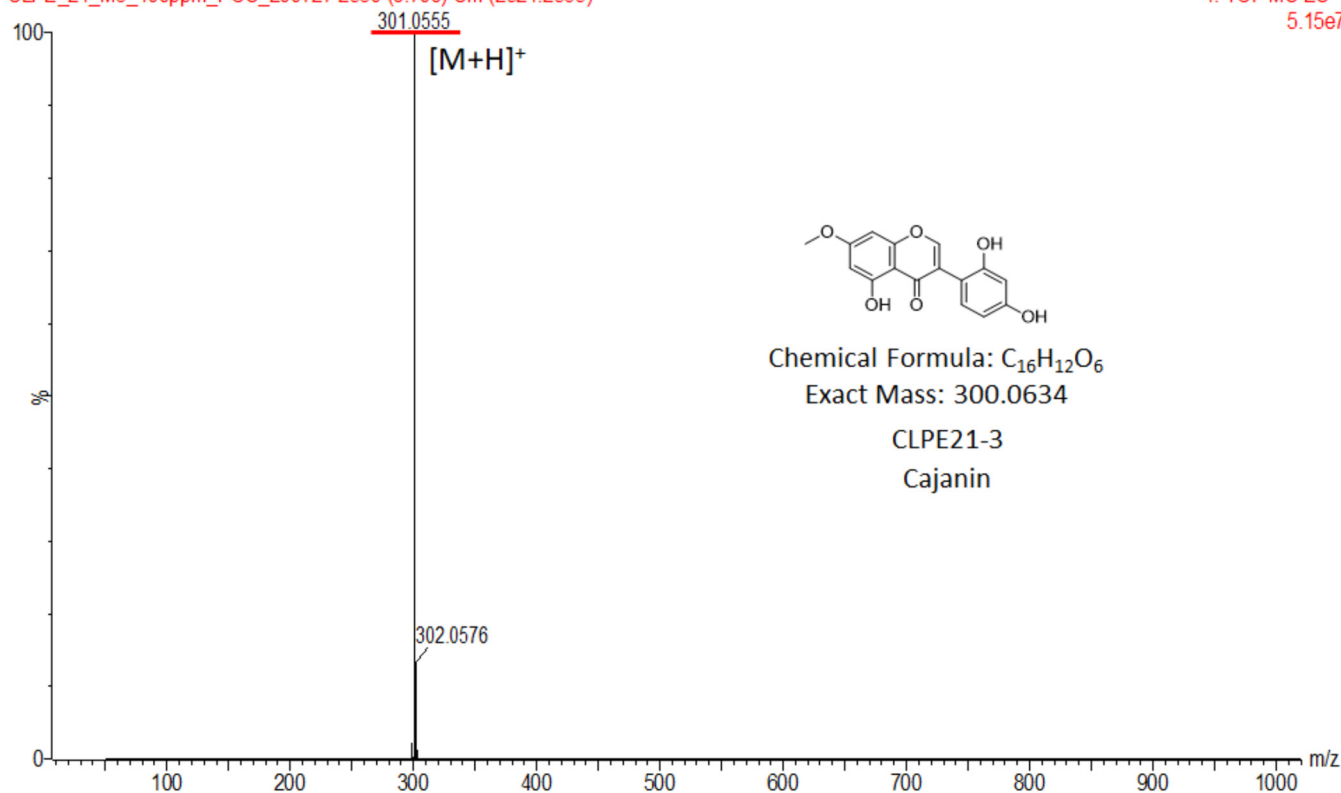

Figure S9. UPLC-QTOF-MS spectrum of cajanin (7).

## PN 8. Medicarpin

| Mass     | Calc. Mass | mDa  | PPM   | DBE | Formula    | C  | H  | O |
|----------|------------|------|-------|-----|------------|----|----|---|
| 271.0940 | 271.0970   | -3.0 | -11.1 | 9.5 | C16 H15 O4 | 16 | 15 | 4 |
|          | 271.1029   | -8.9 | -32.8 | 0.5 | C9 H19 O9  | 9  | 19 | 9 |
|          | 271.0818   | 12.2 | 45.0  | 5.5 | C12 H15 O7 | 12 | 15 | 7 |

CLPE\_22\_3\_100ppm\_POS\_200628 2762 (9.502) Cm (2757:2769)

1: TOF MS ES+  
4.13e6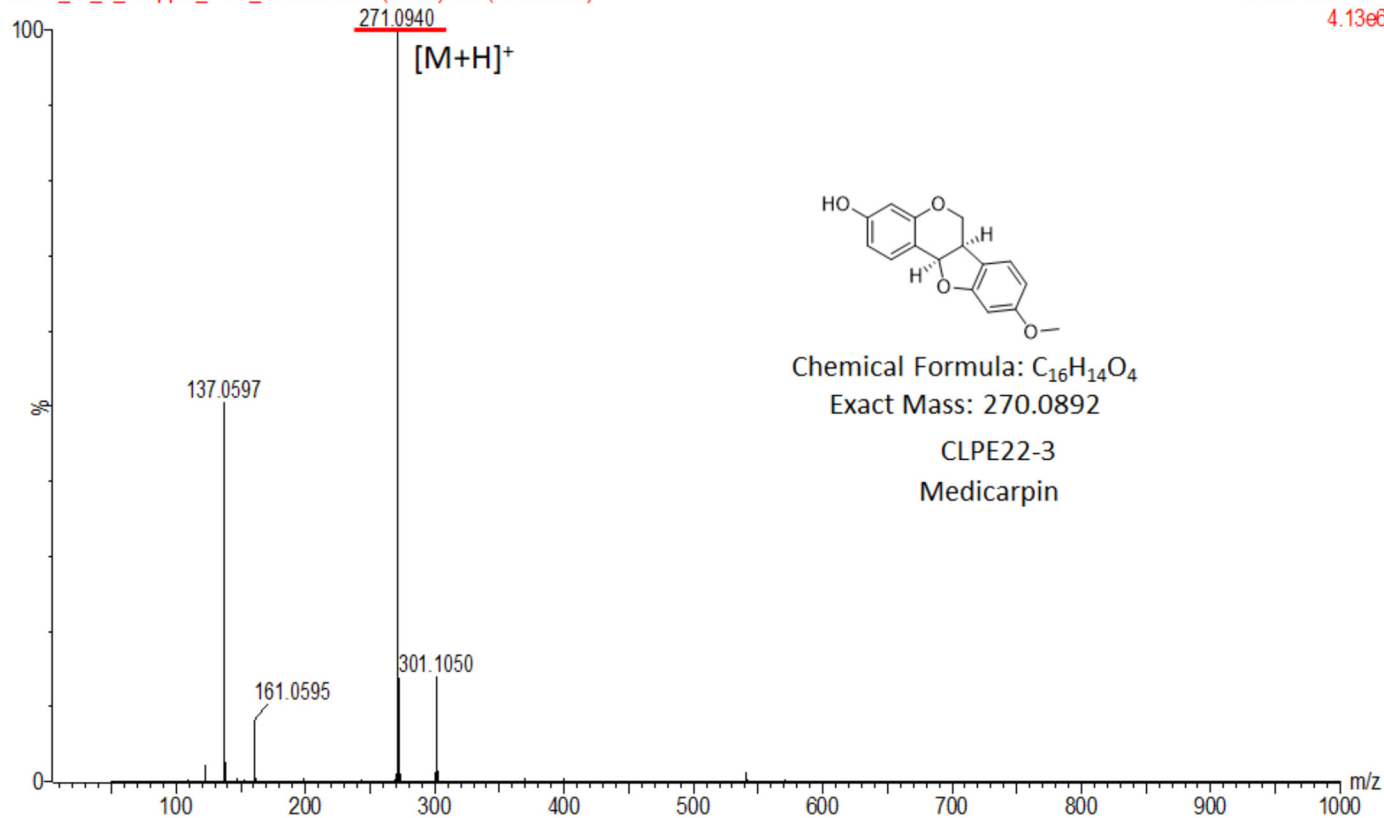

Figure S10. UPLC-QTOF-MS spectrum of medicarpin (8).

## PN 9. Prunetin

| Mass     | Calc. Mass | mDa  | PPM  | DBE  | Formula                                        | C  | H  | O |
|----------|------------|------|------|------|------------------------------------------------|----|----|---|
| 285.0736 | 285.0763   | -2.7 | -9.5 | 10.5 | C <sub>16</sub> H <sub>13</sub> O <sub>5</sub> | 16 | 13 | 5 |
|          | 285.0704   | 3.2  | 11.2 | 19.5 | C <sub>23</sub> H <sub>9</sub>                 | 23 | 9  |   |

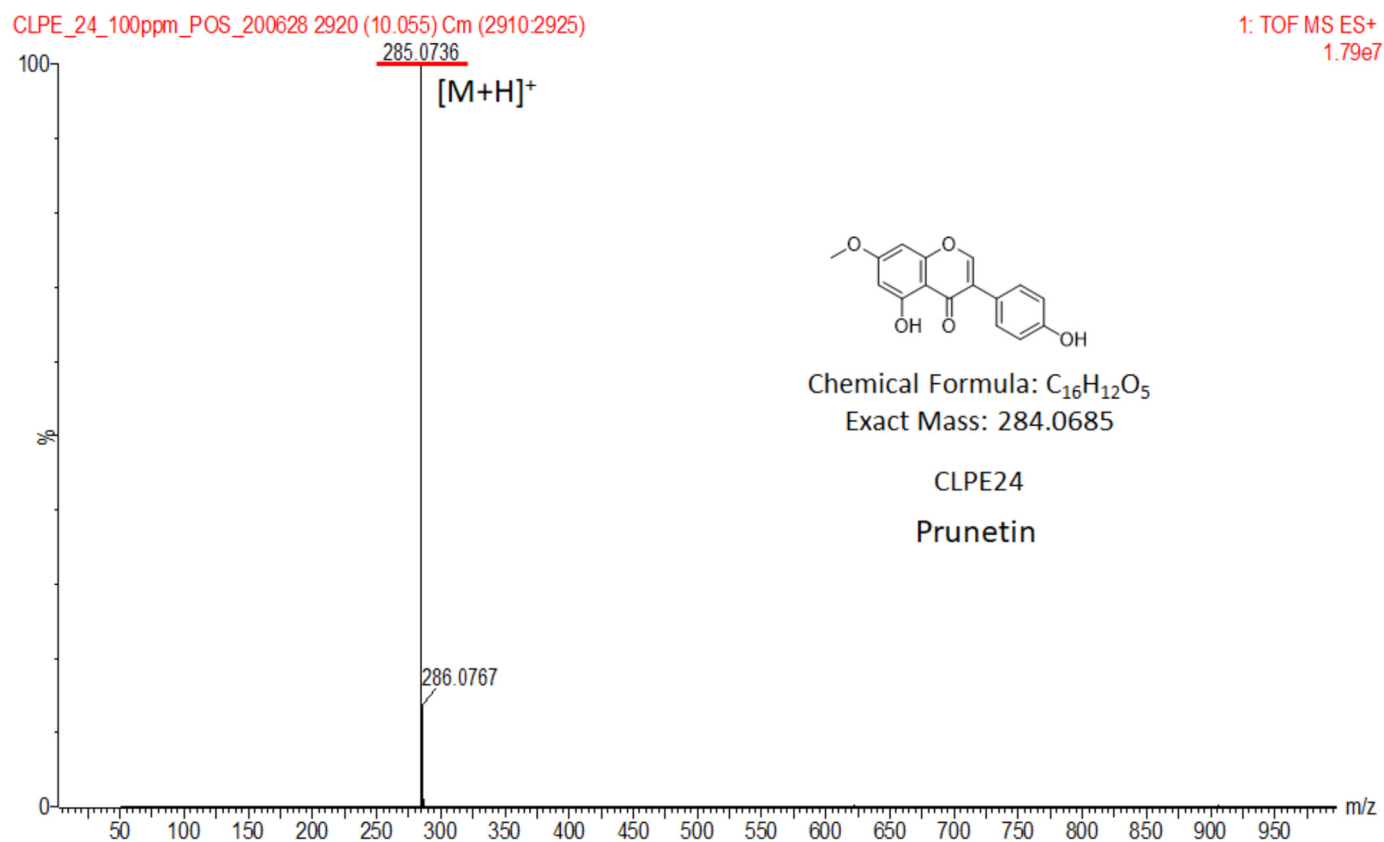

Figure S11. UPLC-QTOF-MS spectrum of prunetin (9).

## PN 10. 7,4'-Dimethyl-3'-hydroxygenistein

| Mass     | Calc. Mass | mDa   | PPM  | DBE  | Formula                                         | C  | H  | O  |
|----------|------------|-------|------|------|-------------------------------------------------|----|----|----|
| 315.0837 | 315.0810   | 2.7   | 8.6  | 19.5 | C <sub>24</sub> H <sub>11</sub> O               | 24 | 11 | 1  |
| 315.0869 | -3.2       | -10.2 | 10.5 |      | C <sub>17</sub> H <sub>15</sub> O <sub>6</sub>  | 17 | 15 | 6  |
| 315.0927 | -9.0       | -28.6 | 1.5  |      | C <sub>10</sub> H <sub>19</sub> O <sub>11</sub> | 10 | 19 | 11 |

CLPE\_27\_3\_100ppm\_POS\_200628 2970 (10.225) Cm (2968:2981)

1: TOF MS ES+  
2.98e7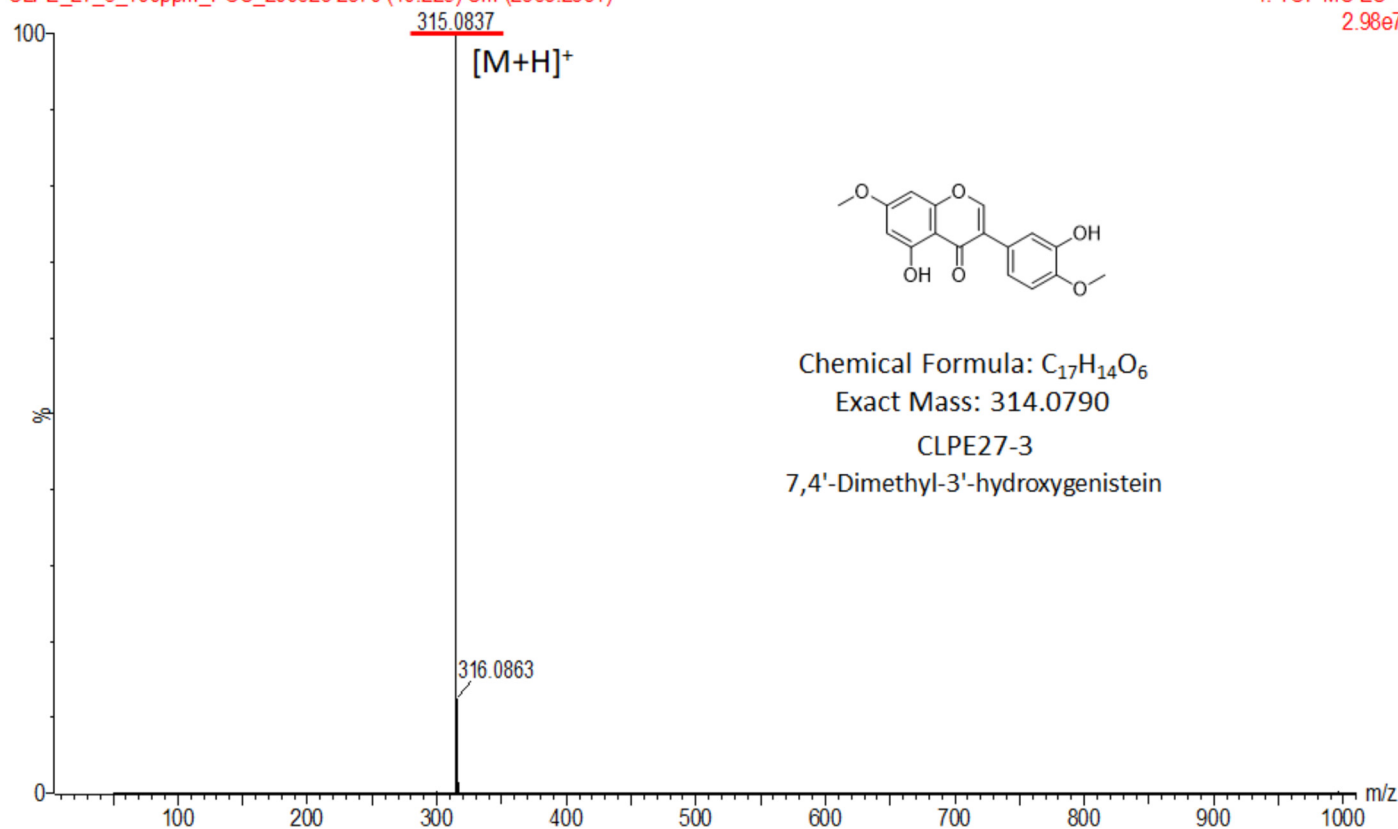

Figure S12. UPLC-QTOF-MS spectrum of 7,4'-dimethyl-3'-hydroxygenistein (10).

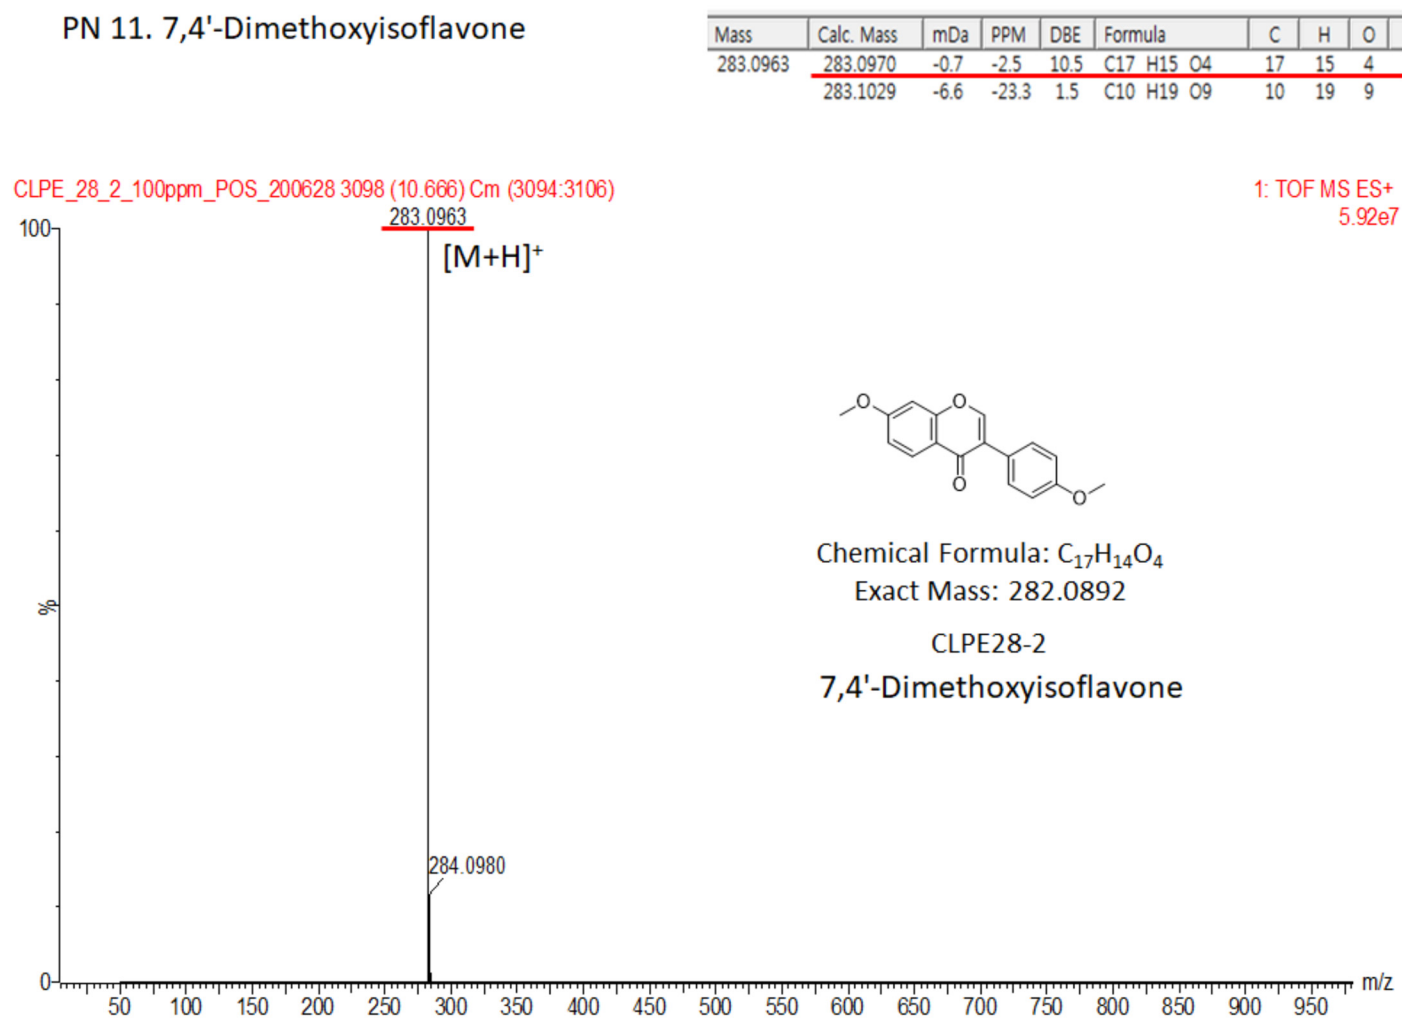

Figure S13. UPLC-QTOF-MS spectrum of 7,4'-dimethoxyisoflavone (11).

## PN 12. Pterocarpin

| Mass     | Calc. Mass | mDa  | PPM  | DBE  | Formula    | C  | H  | O |
|----------|------------|------|------|------|------------|----|----|---|
| 299.0903 | 299.0919   | -1.6 | -5.3 | 10.5 | C17 H15 O5 | 17 | 15 | 5 |
|          | 299.0861   | 4.2  | 14.0 | 19.5 | C24 H11    | 24 | 11 |   |

CLPE\_30\_5\_100ppm\_POS\_200628 3367 (11.590) Cm (3359:3372)

1: TOF MS ES+  
1.45e6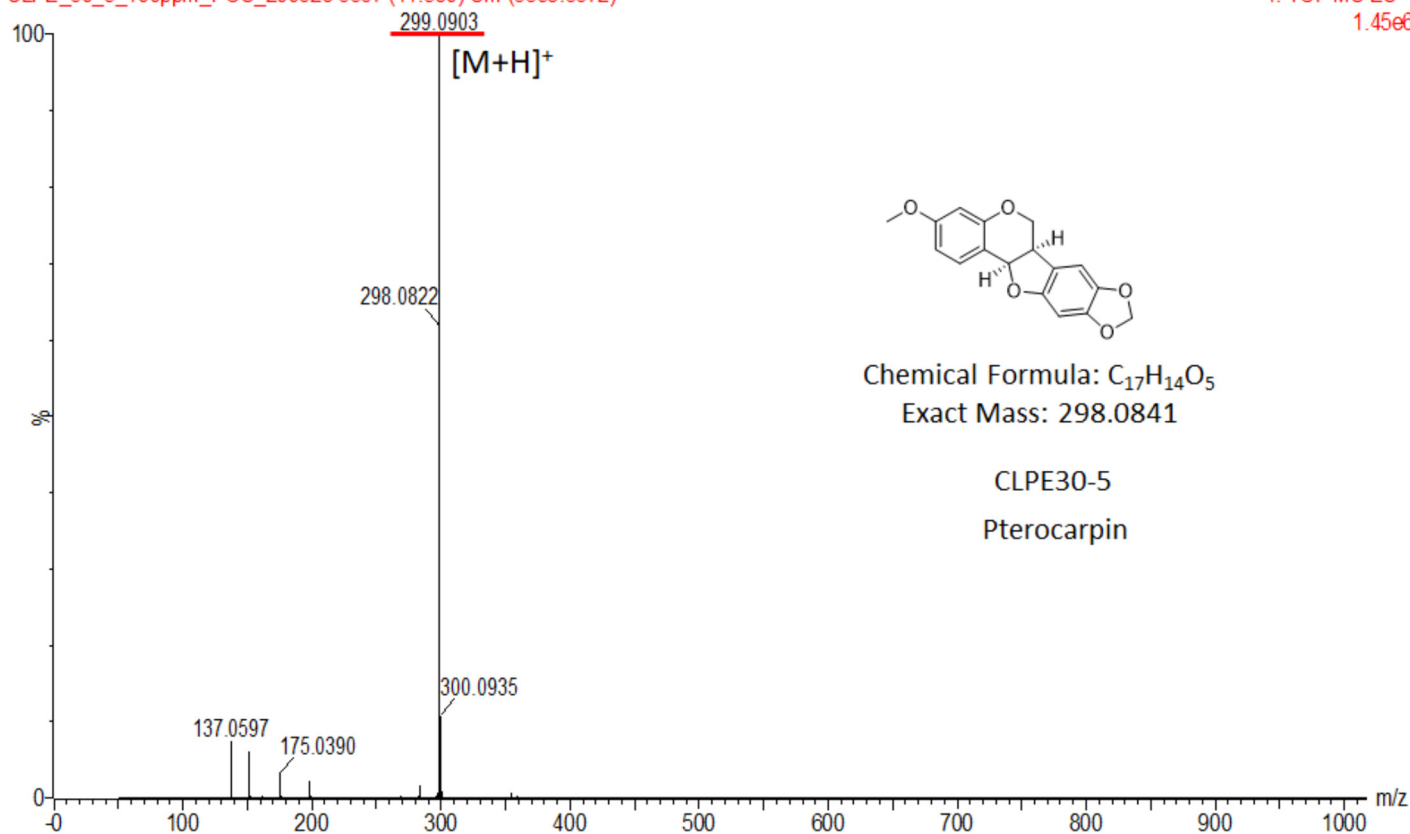

Figure S14. UPLC-QTOF-MS spectrum of pterocarpin (12).

## PN 13. Homopterocarpin

| Mass     | Calc. Mass | mDa   | PPM   | DBE  | Formula    | C  | H  | O |
|----------|------------|-------|-------|------|------------|----|----|---|
| 285.1123 | 285.1127   | -0.4  | -1.4  | 9.5  | C17 H17 O4 | 17 | 17 | 4 |
|          | 285.1186   | -6.3  | -22.1 | 0.5  | C10 H21 O9 | 10 | 21 | 9 |
|          | 285.0974   | 14.9  | 52.3  | 5.5  | C13 H17 O7 | 13 | 17 | 7 |
|          | 285.1279   | -15.6 | -54.7 | 13.5 | C21 H17 O  | 21 | 17 | 1 |

CLPE\_30\_6\_100ppm\_POS\_200628 3456 (11.897) Cm (3453:3466)

1: TOF MS ES+  
5.16e6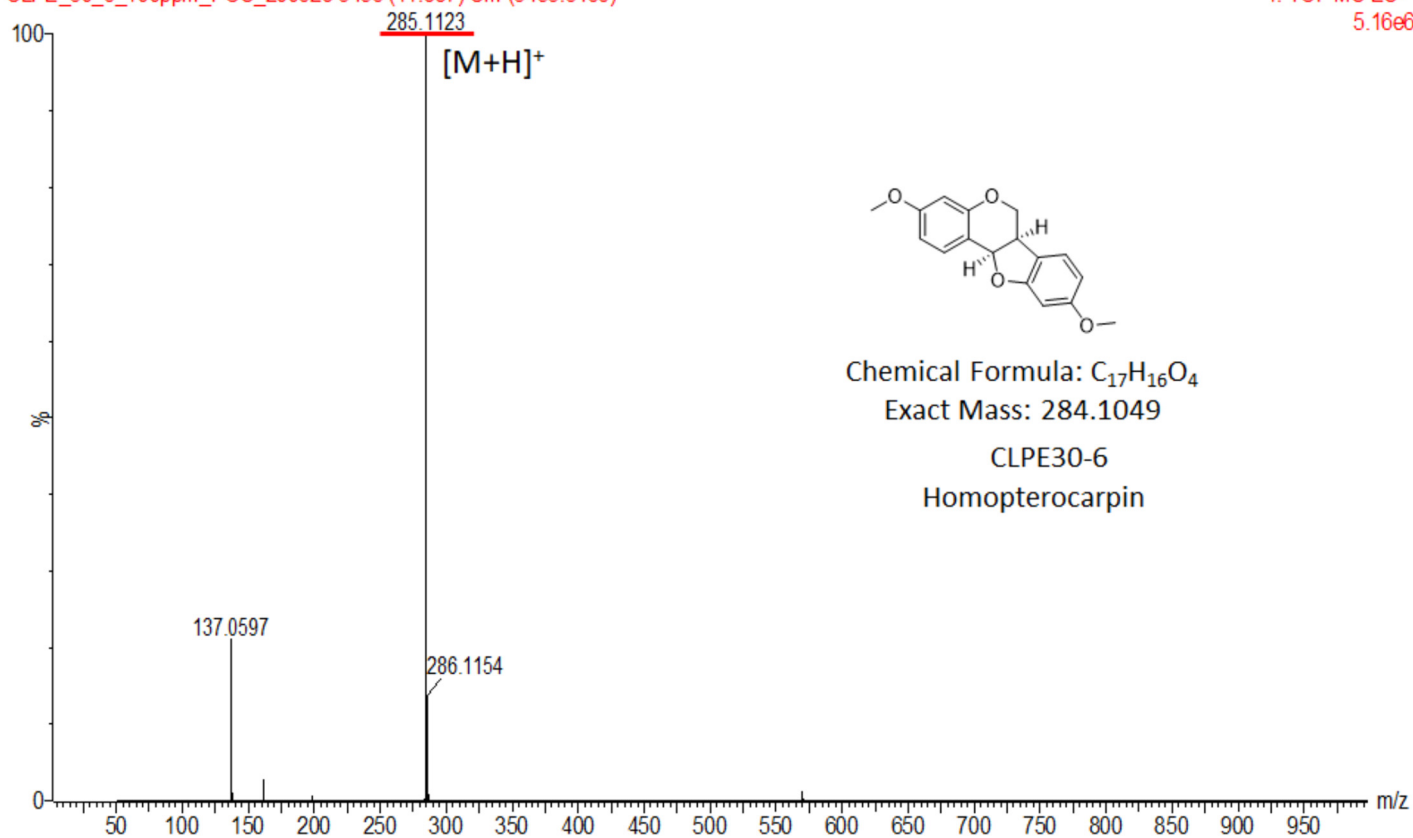

Figure S15. UPLC-QTOF-MS spectrum of homopterocarpin (13).



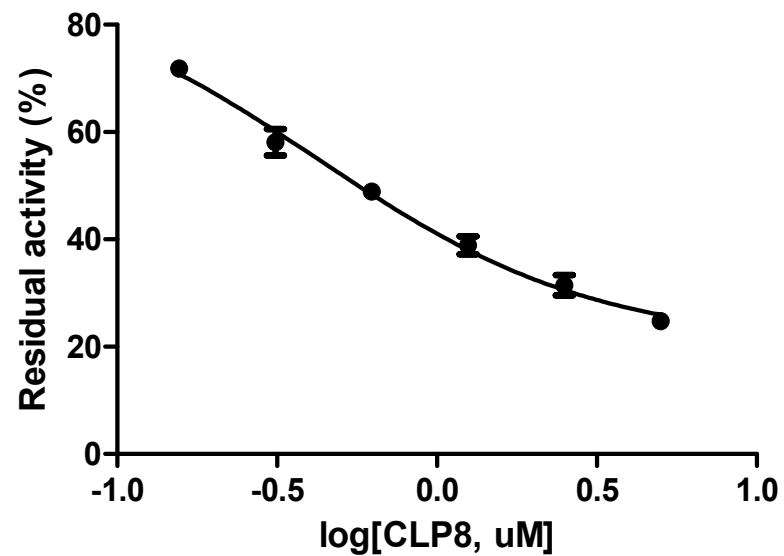

**Figure S16.** IC<sub>50</sub> curve of medicarpin (8) for hMAO-B.

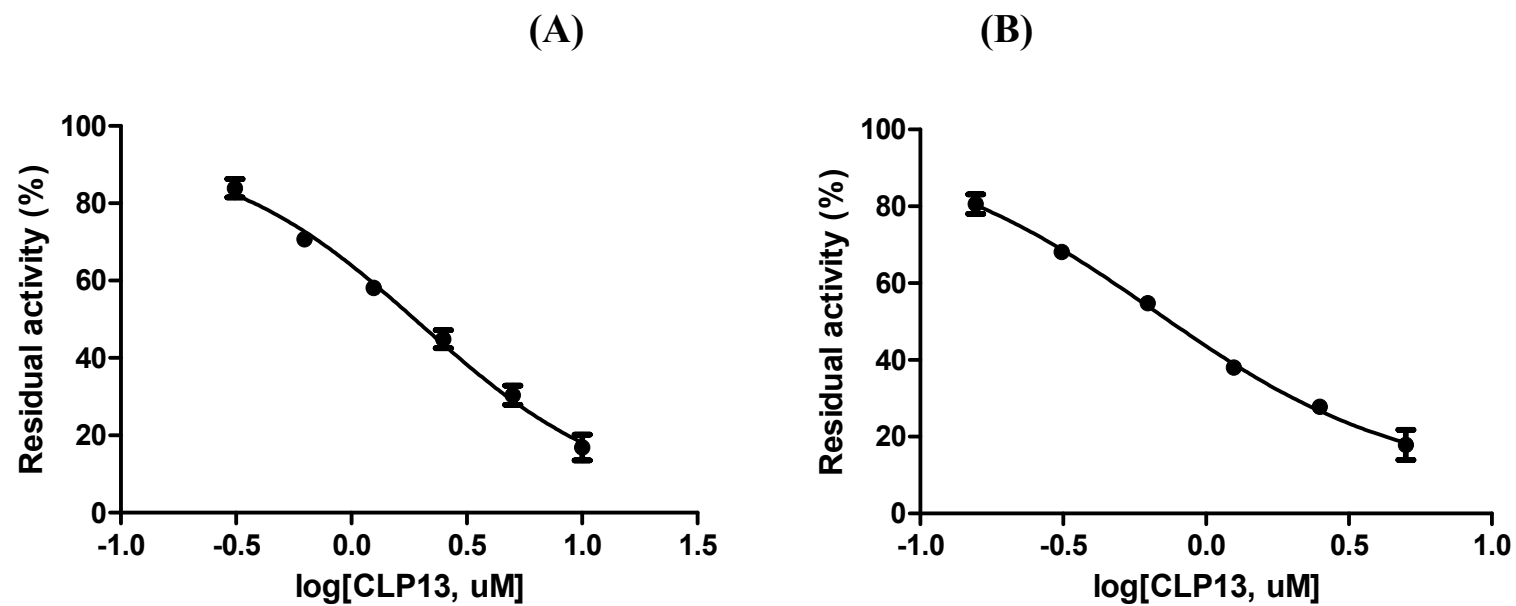

Figure S17. IC<sub>50</sub> curves of homopterocarpin (13) for hMAO-A (A) and hMAO-B (B).
